# Supplementary material
Source: PubMed Central journal article supplement (PMC3376635)
Supplement: mmc1.pdf [file mmc1.pdf]

## **Supplemental Data**

### **Genetic Adaptation of Fatty-Acid Metabolism: A**

### **Human-Specific Haplotype Increasing the Biosynthesis**

### **of Long-Chain Omega-3 and Omega-6 Fatty Acids**

Adam Ameer, Stefan Enroth, Åsa Johansson, Ghazal Zaboli, Wilmar Igl, Anna C.V. Johansson, Manuel A. Rivas, Mark J. Daly, Gerd Schmitz, Andrew A. Hicks, Thomas Meitinger, Lars Feuk, Cornelia van Duijn, Ben Oostra, Peter P. Pramstaller, Igor Rudan, Alan F. Wright, James F. Wilson, Harry Campbell, and Ulf Gyllenstein

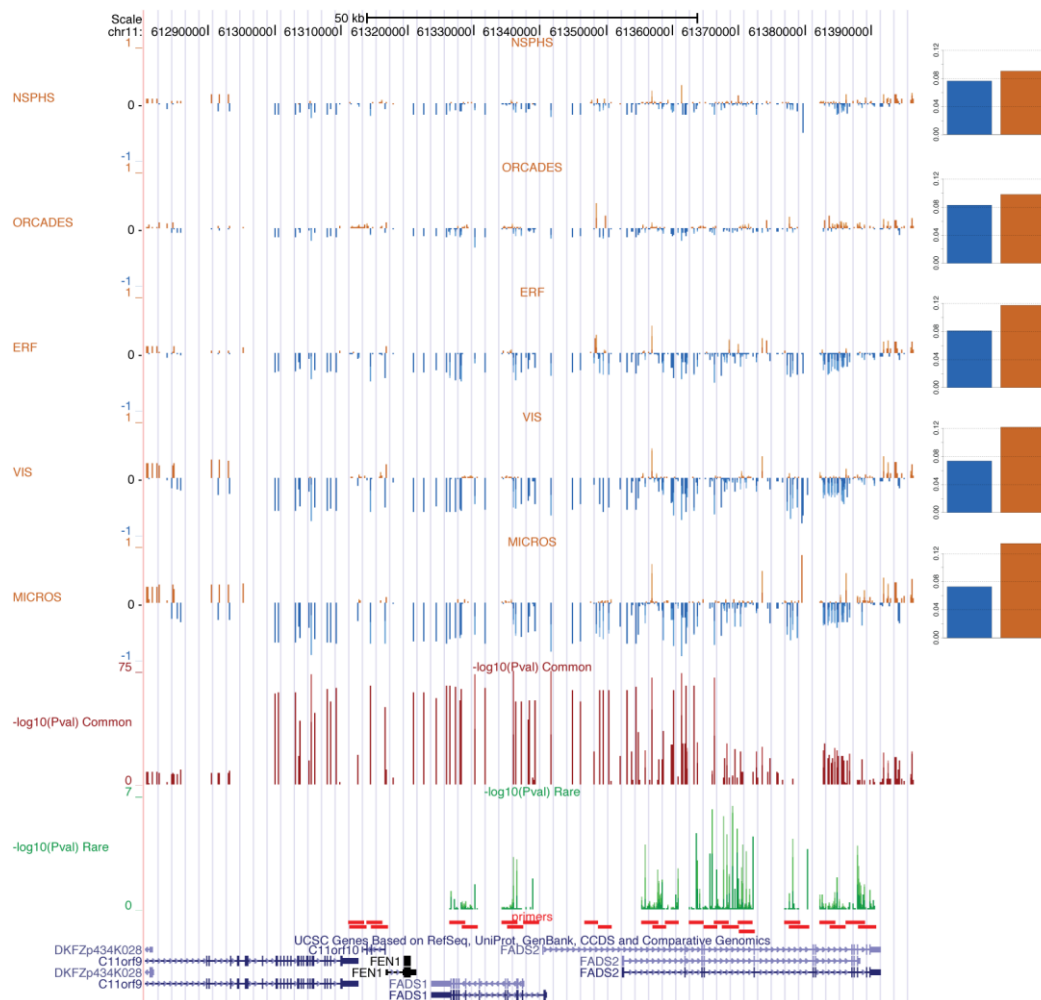

**Figure S1. Overview of the Data Obtained from Genotyping, Imputation, and Resequencing of the FADS Region in the Five European Cohorts**

From bottom to top; the *FADS1* and *FADS2* genes with location of the amplicons used for resequencing (red boxes). The two panels above show the individual association  $p$ -values ( $-\log_{10}$ ) for detected rare variants (green bars) in the resequenced data and for genotypes/imputed SNPs (red bars). The five top panels show individual SNP effects (allele frequency difference between pools) on PC 36:4 for all five cohorts (NSPHS, ORCADES, ERF, VIS and MICROS). The blue and orange boxes on the side show the average PC 36:4 levels for the individuals in the low and high groups.

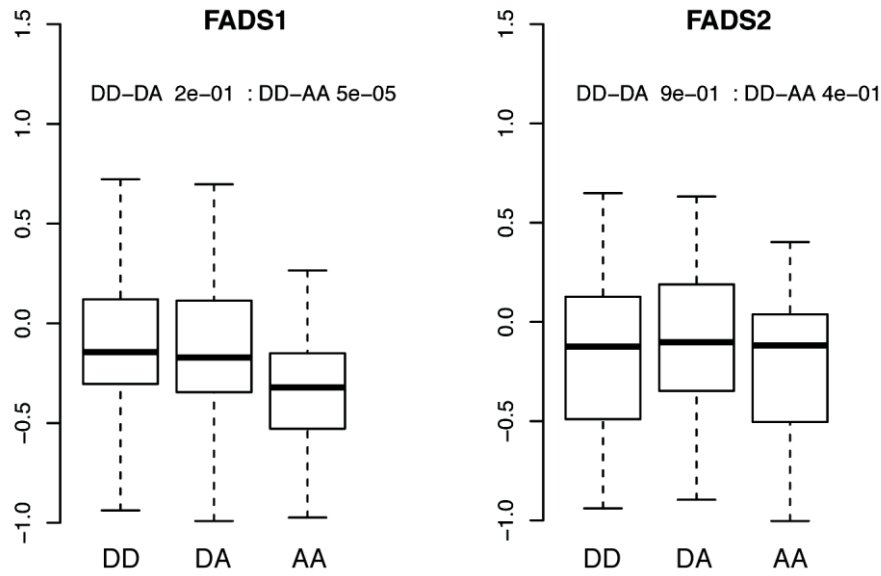

**Figure S2. Expression Ratios for *FADS1* and *FADS2* in Liver Samples**

The gene expression levels are based on microarray measurements in 195 individuals. Data points were grouped according to haplotype and difference in expression ratio levels between the groups was tested for significance using Wilcoxon ranked sum test. In *FADS1* the expression ratio levels of individuals homozygous for haplotype *A* have significantly lower expression ( $p$ -value =  $5 \cdot 10^{-5}$ ) than individuals homozygous for haplotype *D*.

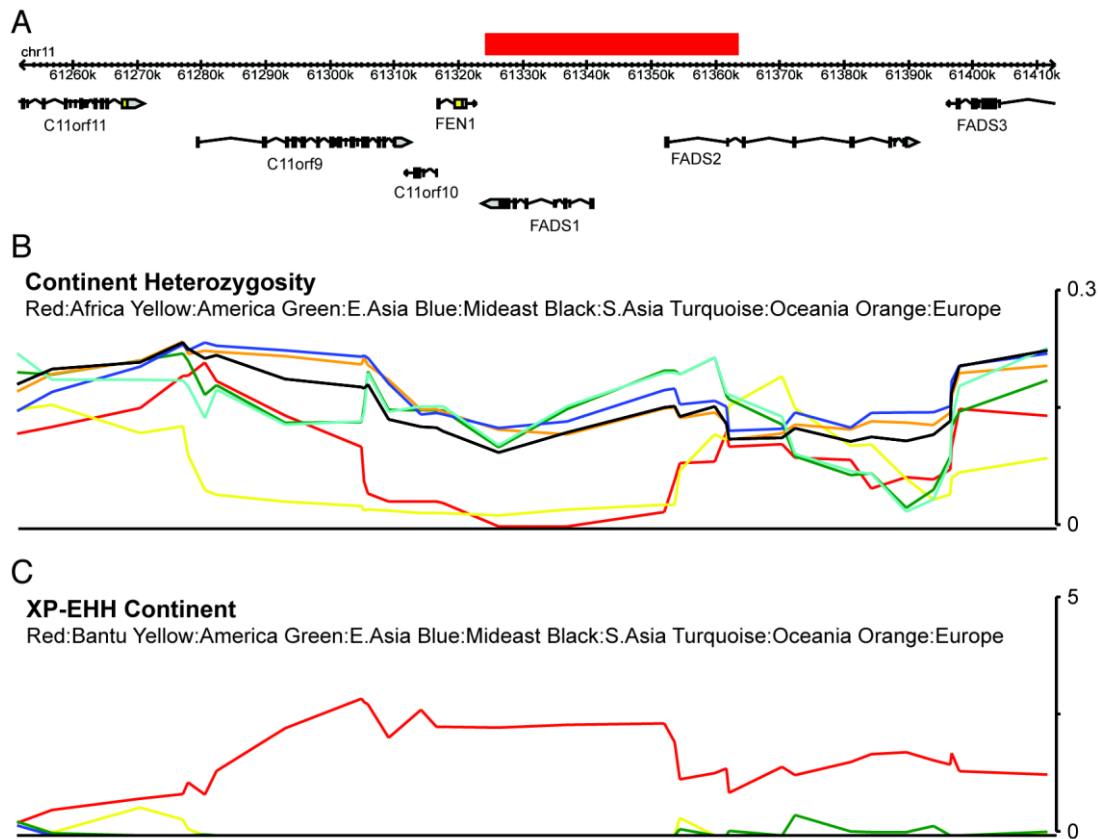

**Figure S3. Evidence for a Selective Sweep for Haplotype *D* in Africa**

The figure shows data from the HGDP selection browser (<http://hgdp.uchicago.edu/>).

(A) Gene coordinates (hg18 assembly version) in a 150 kb window surrounding *FADS1* and *FADS2*. The red rectangle indicates the position of the two main FADS haplotypes as defined by the 28 SNPs.

(B) Heterozygosity scores for HGDP populations on different continents. African (red line) and American populations (yellow) have almost zero heterozygosity in a region overlapping with the FADS haplotypes.

(C) Extended haplotype homozygosity (XP-EHH) scores indicate a strong positive selection in the pooled African Bantu-speaking populations (red line). The XP-EHH scores are lower for populations on other continents (other colors). The Bantu-speaking group in these calculations consists of 62 individuals (all African HGDP individuals except Pygmies, Mozabite and San).

**Table S1. SNP Associations with High Levels of Phosphatidylcholine (PC) 36:4 for 134 SNPs in the FADS Region**

| Name        | Position (hg19) | Assoc Allele | Allele Counts High/Low PC 36:4 | Allele Frequencies High/Low PC 36:4 | p Value  | LD Block |
|-------------|-----------------|--------------|--------------------------------|-------------------------------------|----------|----------|
| rs174541    | chr11:61565908  | T            | 707:175, 359:503               | 0.802, 0.416                        | 3.97E-61 | block1   |
| rs174544    | chr11:61567753  | G            | 733:149, 403:459               | 0.831, 0.468                        | 4.00E-57 | block1   |
| rs174545    | chr11:61569306  | C            | 723:159, 364:498               | 0.820, 0.422                        | 9.53E-66 | block1   |
| rs174546    | chr11:61569830  | C            | 721:161, 363:499               | 0.817, 0.421                        | 2.81E-65 | block1   |
| rs174547    | chr11:61570783  | T            | 722:160, 366:496               | 0.819, 0.425                        | 1.11E-64 | block1   |
| rs174548    | chr11:61571348  | C            | 733:149, 408:454               | 0.831, 0.473                        | 1.40E-55 | block1   |
| rs174549    | chr11:61571382  | C            | 733:149, 408:454               | 0.831, 0.473                        | 1.40E-55 | block1   |
| rs174550    | chr11:61571478  | T            | 722:160, 369:493               | 0.819, 0.428                        | 1.09E-63 | block1   |
| rs4564341   | chr11:61573540  | C            | 772:52, 655:137                | 0.937, 0.827                        | 6.39E-12 | block1   |
| rs174551    | chr11:61573684  | A            | 722:160, 373:489               | 0.819, 0.433                        | 2.24E-62 | block1   |
| rs174553    | chr11:61575158  | T            | 723:159, 370:492               | 0.820, 0.429                        | 9.36E-64 | block1   |
| rs116878346 | chr11:61579381  | A            | 868:14, 801:61                 | 0.984, 0.929                        | 1.61E-08 | block1   |
| rs174554    | chr11:61579463  | A            | 722:160, 369:493               | 0.819, 0.428                        | 1.09E-63 | block1   |
| rs174555    | chr11:61579760  | T            | 735:147, 412:450               | 0.833, 0.478                        | 4.02E-55 | block1   |
| rs174556    | chr11:61580635  | G            | 734:148, 411:451               | 0.832, 0.477                        | 4.80E-55 | block1   |
| rs174559    | chr11:61581656  | G            | 748:134, 469:393               | 0.848, 0.544                        | 1.88E-43 | block1   |
| rs174560    | chr11:61581764  | T            | 733:149, 408:454               | 0.831, 0.473                        | 1.40E-55 | block1   |
| rs12361868  | chr11:61582297  | C            | 870:12, 823:39                 | 0.986, 0.955                        | 8.83E-05 | block1   |
| rs75810419  | chr11:61582527  | C            | 868:14, 801:61                 | 0.984, 0.929                        | 1.61E-08 | block1   |
| rs174561    | chr11:61582708  | A            | 733:149, 408:454               | 0.831, 0.473                        | 1.40E-55 | block1   |
| rs116980792 | chr11:61585140  | C            | 867:15, 801:61                 | 0.983, 0.929                        | 3.84E-08 | block1   |
| rs174562    | chr11:61585144  | A            | 721:161, 369:493               | 0.817, 0.428                        | 2.73E-63 | block1   |
| rs174564    | chr11:61588305  | A            | 721:161, 370:492               | 0.817, 0.429                        | 5.80E-63 | block1   |
| rs28456     | chr11:61589481  | T            | 734:148, 410:452               | 0.832, 0.476                        | 2.37E-55 | block1   |
| rs174566    | chr11:61592362  | T            | 721:161, 370:492               | 0.817, 0.429                        | 5.80E-63 | block1   |
| rs174567    | chr11:61593005  | A            | 721:161, 372:490               | 0.817, 0.432                        | 2.62E-62 | block1   |
| rs174568    | chr11:61593816  | G            | 721:161, 370:492               | 0.817, 0.429                        | 5.80E-63 | block1   |
| rs174569    | chr11:61594164  | T            | 615:9, 508:18                  | 0.986, 0.966                        | 0.0272   | block1   |
| rs968567    | chr11:61595564  | G            | 790:62, 622:186                | 0.927, 0.770                        | 2.40E-19 | block1   |
| rs99780     | chr11:61596633  | C            | 721:161, 370:492               | 0.817, 0.429                        | 5.80E-63 | block1   |
| rs78596000  | chr11:61597461  | T            | 856:14, 778:56                 | 0.984, 0.933                        | 1.11E-07 | block1   |
| rs1535      | chr11:61597972  | T            | 721:161, 365:497               | 0.817, 0.423                        | 1.30E-64 | block1   |
| rs174572    | chr11:61598288  | C            | 783:99, 548:314                | 0.888, 0.636                        | 3.45E-35 | block1   |
| rs79976480  | chr11:61598391  | T            | 868:14, 801:61                 | 0.984, 0.929                        | 1.61E-08 | block1   |
| rs117553420 | chr11:61599329  | C            | 868:14, 801:61                 | 0.984, 0.929                        | 1.61E-08 | block1   |
| rs61897793  | chr11:61599347  | C            | 819:63, 667:195                | 0.929, 0.774                        | 8.79E-20 | block1   |
| rs11230803  | chr11:61599991  | G            | 697:7, 696:26                  | 0.990, 0.964                        | 0.0011   | block1   |
| rs174573    | chr11:61600327  | C            | 783:99, 548:314                | 0.888, 0.636                        | 3.45E-35 | block1   |
| rs174574    | chr11:61600342  | G            | 721:161, 365:497               | 0.817, 0.423                        | 1.30E-64 | block1   |
| rs76498378  | chr11:61601202  | C            | 867:15, 801:61                 | 0.983, 0.929                        | 3.84E-08 | block1   |
| rs174575    | chr11:61602003  | G            | 782:100, 544:318               | 0.887, 0.631                        | 7.64E-36 | block1   |
| rs174576    | chr11:61603510  | G            | 722:160, 373:489               | 0.819, 0.433                        | 2.24E-62 | block1   |
| rs117220229 | chr11:61604324  | T            | 866:16, 793:69                 | 0.982, 0.920                        | 1.94E-09 | block1   |
| rs174577    | chr11:61604814  | G            | 720:162, 361:501               | 0.816, 0.419                        | 1.52E-65 | block1   |
| rs174578    | chr11:61605499  | T            | 720:162, 360:502               | 0.816, 0.418                        | 7.01E-66 | block1   |
| rs75992720  | chr11:61605578  | T            | 862:20, 788:74                 | 0.977, 0.914                        | 5.19E-09 | block1   |
| rs174579    | chr11:61605613  | G            | 774:78, 578:230                | 0.908, 0.715                        | 4.69E-24 | block1   |
| rs174580    | chr11:61606642  | T            | 719:163, 359:503               | 0.815, 0.416                        | 8.15E-66 | block1   |
| rs174581    | chr11:61606683  | G            | 719:163, 359:503               | 0.815, 0.416                        | 8.15E-66 | block1   |
| rs77020029  | chr11:61607107  | C            | 862:20, 788:74                 | 0.977, 0.914                        | 5.19E-09 | block1   |
| rs174582    | chr11:61607168  | T            | 774:78, 578:230                | 0.908, 0.715                        | 4.69E-24 | block1   |
| rs80349011  | chr11:61607457  | C            | 645:7, 603:13                  | 0.989, 0.979                        | 0.1386   | block1   |
| rs17156426  | chr11:61609323  | A            | 862:20, 788:74                 | 0.977, 0.914                        | 5.19E-09 | block1   |
| rs10897180  | chr11:61609448  | T            | 719:7, 709:37                  | 0.990, 0.950                        | 6.77E-06 | block1   |
| rs11230807  | chr11:61609708  | G            | 719:7, 709:37                  | 0.990, 0.950                        | 6.77E-06 | block1   |
| rs174583    | chr11:61609750  | G            | 703:167, 354:480               | 0.808, 0.424                        | 8.40E-60 | block1   |
| rs75766519  | chr11:61611033  | T            | 861:21, 788:74                 | 0.976, 0.914                        | 1.15E-08 | block1   |
| rs174585    | chr11:61611694  | C            | 770:82, 577:231                | 0.904, 0.714                        | 5.43E-23 | block1   |

|             |                |   |                  |              |          |        |
|-------------|----------------|---|------------------|--------------|----------|--------|
| rs117702910 | chr11:61611913 | C | 861:21, 788:74   | 0.976, 0.914 | 1.15E-08 | block1 |
| rs75321677  | chr11:61612468 | G | 861:21, 788:74   | 0.976, 0.914 | 1.15E-08 | block1 |
| rs11601892  | chr11:61612560 | G | 719:7, 709:37    | 0.990, 0.950 | 6.77E-06 | block1 |
| rs174587    | chr11:61612830 | C | 775:77, 582:226  | 0.910, 0.720 | 1.84E-23 | block1 |
| rs150336394 | chr11:61613137 | C | 861:21, 788:74   | 0.976, 0.914 | 1.15E-08 | block1 |
| rs93923     | chr11:61613745 | C | 771:81, 581:227  | 0.905, 0.719 | 2.10E-22 | block1 |
| rs12284876  | chr11:61613841 | T | 861:21, 788:74   | 0.976, 0.914 | 1.15E-08 | block1 |
| rs17156442  | chr11:61614023 | G | 861:21, 788:74   | 0.976, 0.914 | 1.15E-08 | block1 |
| rs7935946   | chr11:61615542 | C | 861:21, 788:74   | 0.976, 0.914 | 1.15E-08 | block1 |
| rs78791707  | chr11:61616069 | A | 861:21, 788:74   | 0.976, 0.914 | 1.15E-08 | block1 |
| rs75471190  | chr11:61616322 | A | 861:21, 788:74   | 0.976, 0.914 | 1.15E-08 | block1 |
| rs174590    | chr11:61616977 | C | 771:81, 584:224  | 0.905, 0.723 | 9.83E-22 | block1 |
| rs115588270 | chr11:61617015 | C | 861:21, 789:73   | 0.976, 0.915 | 1.82E-08 | block1 |
| rs55896837  | chr11:61617753 | T | 861:21, 789:73   | 0.976, 0.915 | 1.82E-08 | block1 |
| rs61897795  | chr11:61618169 | A | 797:55, 642:166  | 0.935, 0.795 | 3.02E-17 | block1 |
| rs916924    | chr11:61619181 | A | 862:20, 790:72   | 0.977, 0.916 | 1.32E-08 | block1 |
| rs916925    | chr11:61619294 | G | 862:20, 792:70   | 0.977, 0.919 | 3.31E-08 | block1 |
| rs11607437  | chr11:61620079 | C | 863:19, 820:42   | 0.978, 0.951 | 0.002    | block1 |
| rs73487492  | chr11:61621611 | A | 709:13, 639:59   | 0.982, 0.915 | 1.12E-08 | block1 |
| rs562172    | chr11:61626167 | T | 73:745, 39:791   | 0.089, 0.047 | 7.00E-04 | block2 |
| rs174603    | chr11:61626206 | C | 661:191, 485:365 | 0.776, 0.571 | 1.77E-19 | block2 |
| rs174604    | chr11:61626270 | G | 626:226, 384:424 | 0.735, 0.475 | 2.58E-27 | block2 |
| rs174605    | chr11:61626921 | C | 717:165, 541:321 | 0.813, 0.628 | 6.13E-18 | block2 |
| rs174606    | chr11:61626973 | G | 553:299, 345:463 | 0.649, 0.427 | 1.13E-19 | block2 |
| rs174607    | chr11:61627321 | C | 725:157, 570:292 | 0.822, 0.661 | 1.64E-14 | block2 |
| rs174608    | chr11:61627484 | T | 716:166, 540:322 | 0.812, 0.626 | 6.67E-18 | block2 |
| rs174609    | chr11:61627811 | A | 559:293, 346:462 | 0.656, 0.428 | 1.17E-20 | block2 |
| rs174610    | chr11:61627833 | T | 558:294, 347:461 | 0.655, 0.429 | 2.94E-20 | block2 |
| rs174611    | chr11:61627881 | T | 716:166, 540:322 | 0.812, 0.626 | 6.67E-18 | block2 |
| rs74771917  | chr11:61627960 | C | 854:28, 815:47   | 0.968, 0.945 | 0.0191   | block2 |
| rs174612    | chr11:61628266 | G | 553:299, 346:462 | 0.649, 0.428 | 1.78E-19 | block2 |
| rs500850    | chr11:61628290 | C | 73:745, 43:787   | 0.089, 0.052 | 0.003    | block2 |
| rs174613    | chr11:61628492 | C | 553:299, 346:462 | 0.649, 0.428 | 1.78E-19 | block2 |
| rs174614    | chr11:61628915 | A | 553:299, 346:462 | 0.649, 0.428 | 1.78E-19 | block2 |
| rs174616    | chr11:61629122 | C | 552:300, 346:462 | 0.648, 0.428 | 2.78E-19 | block2 |
| rs174617    | chr11:61629166 | A | 553:299, 347:461 | 0.649, 0.429 | 2.80E-19 | block2 |
| rs174618    | chr11:61629322 | T | 590:262, 403:405 | 0.692, 0.499 | 8.49E-16 | block2 |
| rs113003506 | chr11:61629377 | G | 797:85, 725:137  | 0.904, 0.841 | 8.89E-05 | block2 |
| rs11230813  | chr11:61629576 | A | 37:845, 34:828   | 0.042, 0.039 | 0.7911   | block2 |
| rs174620    | chr11:61629747 | A | 590:262, 403:405 | 0.692, 0.499 | 8.49E-16 | block2 |
| rs174621    | chr11:61630104 | C | 745:107, 571:237 | 0.874, 0.707 | 3.54E-17 | block2 |
| rs11605884  | chr11:61630133 | A | 850:32, 815:47   | 0.964, 0.945 | 0.067    | block2 |
| rs520298    | chr11:61631282 | A | 72:746, 43:787   | 0.088, 0.052 | 0.0039   | block2 |
| rs639394    | chr11:61631331 | C | 73:745, 43:787   | 0.089, 0.052 | 0.003    | block2 |
| rs518511    | chr11:61631454 | G | 73:745, 43:787   | 0.089, 0.052 | 0.003    | block2 |
| rs3168072   | chr11:61631510 | T | 850:32, 815:47   | 0.964, 0.945 | 0.067    | block2 |
| rs3741      | chr11:61631614 | A | 73:745, 43:787   | 0.089, 0.052 | 0.003    | block2 |
| rs174622    | chr11:61631927 | C | 745:107, 571:237 | 0.874, 0.707 | 3.54E-17 | block2 |
| rs654226    | chr11:61632298 | C | 73:745, 43:787   | 0.089, 0.052 | 0.003    | block2 |
| rs12577276  | chr11:61632310 | A | 850:32, 815:47   | 0.964, 0.945 | 0.067    | block2 |
| rs482548    | chr11:61633182 | T | 73:745, 43:787   | 0.089, 0.052 | 0.003    | block2 |
| rs11539526  | chr11:61633770 | C | 798:84, 733:129  | 0.905, 0.850 | 5.00E-04 | block2 |
| rs77167250  | chr11:61633947 | C | 798:84, 733:129  | 0.905, 0.850 | 5.00E-04 | block2 |
| rs113268188 | chr11:61634829 | A | 798:84, 734:128  | 0.905, 0.852 | 7.00E-04 | block2 |
| rs17764324  | chr11:61635088 | G | 800:82, 733:129  | 0.907, 0.850 | 3.00E-04 | block2 |
| rs17831757  | chr11:61635200 | T | 800:82, 733:129  | 0.907, 0.850 | 3.00E-04 | block2 |
| rs174623    | chr11:61635294 | A | 552:300, 349:459 | 0.648, 0.432 | 1.07E-18 | block2 |
| rs6591661   | chr11:61635689 | T | 800:82, 733:129  | 0.907, 0.850 | 3.00E-04 | block2 |
| rs6591662   | chr11:61635814 | G | 770:82, 687:121  | 0.904, 0.850 | 9.00E-04 | block2 |
| rs6591663   | chr11:61635992 | A | 800:82, 733:129  | 0.907, 0.850 | 3.00E-04 | block2 |
| rs174625    | chr11:61636013 | T | 553:259, 360:392 | 0.681, 0.479 | 5.08E-16 | block2 |
| rs7395424   | chr11:61636017 | A | 798:84, 733:129  | 0.905, 0.850 | 5.00E-04 | block2 |
| rs11230815  | chr11:61636126 | G | 800:82, 733:129  | 0.907, 0.850 | 3.00E-04 | block2 |
| rs11230816  | chr11:61636253 | C | 800:82, 733:129  | 0.907, 0.850 | 3.00E-04 | block2 |

|            |                |   |                  |              |          |        |
|------------|----------------|---|------------------|--------------|----------|--------|
| rs11230817 | chr11:61636255 | A | 800:82, 733:129  | 0.907, 0.850 | 3.00E-04 | block2 |
| rs174626   | chr11:61637057 | A | 546:306, 345:463 | 0.641, 0.427 | 2.46E-18 | block2 |
| rs7394459  | chr11:61637349 | A | 800:82, 733:129  | 0.907, 0.850 | 3.00E-04 | block2 |
| rs174627   | chr11:61637466 | C | 815:67, 710:152  | 0.924, 0.824 | 2.54E-10 | block2 |
| rs174628   | chr11:61637587 | A | 736:116, 566:242 | 0.864, 0.700 | 6.04E-16 | block2 |
| rs7104849  | chr11:61638044 | T | 800:82, 735:127  | 0.907, 0.853 | 5.00E-04 | block2 |
| rs472031   | chr11:61638420 | T | 72:746, 50:780   | 0.088, 0.060 | 0.0313   | block2 |
| rs508768   | chr11:61639335 | G | 71:747, 45:785   | 0.087, 0.054 | 0.0097   | block2 |
| rs7118175  | chr11:61639358 | T | 803:35, 741:83   | 0.958, 0.899 | 2.87E-06 | block2 |
| rs422249   | chr11:61639488 | C | 676:206, 485:377 | 0.766, 0.563 | 1.88E-19 | block2 |
| rs174448   | chr11:61639573 | T | 620:232, 404:404 | 0.728, 0.500 | 1.45E-21 | block2 |
| rs7481842  | chr11:61639705 | A | 801:81, 739:123  | 0.908, 0.857 | 0.001    | block2 |

**Table S2. Nucleotide Sequences for Primates and Hominins at the 28 SNP Positions that Discriminate between Haplotypes *D* and *A***

| Id | rs #                  | Human hg19 Position | Human Haplotypes |          | Rhesus           | Gorilla          | Chimpanzee       |              |              | Denisova       | Neandertal     |
|----|-----------------------|---------------------|------------------|----------|------------------|------------------|------------------|--------------|--------------|----------------|----------------|
|    |                       |                     | <i>D</i>         | <i>A</i> | Ref <sup>a</sup> | Ref <sup>a</sup> | Ref <sup>a</sup> | SOLiD Reads1 | SOLiD Reads2 | Illumina Reads | Illumina Reads |
| 1  | rs174544              | 61567753            | C                | A        | C                | C                | C                | C(6)         |              | C(21)          | C(6)           |
| 2  | rs174545              | 61569306            | C                | G        | G                | G                | G                | G(7)         | G(7)         | G(29)          | G(5)           |
| 3  | rs174546              | 61569830            | C                | T        | T                | T                | T                | T(9)         | T(3)         | T(25)          | C(3),T(1)      |
| 4  | rs174547              | 61570783            | T                | C        | C                | C                | C                | C(11)        | C(1)         | C(16)          | T(2)           |
| 5  | rs174548              | 61571348            | C                | G        | G                | G                | G                | G(10)        | G(23)        | G(36)          | G(1)           |
| 6  | rs174549              | 61571382            | G                | A        | A                | A                | A                | A(14)        | A(26)        | A(28)          | G(1)           |
| 7  | rs174550              | 61571478            | T                | C        | C                | C                | C                | C(9)         | C(14)        | C(23)          | C(1)           |
| 8  | rs174551              | 61573684            | T                | C        | -                | -                | -                |              |              | T(1)           |                |
| 9  | rs174553              | 61575158            | A                | G        | G                | G                | G                | G(6)         | G(7)         | G(25)          | G(3)           |
| 10 | rs174554              | 61579463            | A                | G        | G                | G                | G                | G(9)         | G(7)         | G(21)          | A(1)           |
| 11 | rs174555              | 61579760            | T                | C        | C                | C                | C                | C(11)        | C(14)        | C(33),A(1)     |                |
| 12 | rs174556              | 61580635            | C                | T        | C                | C                | C                | C(11)        | C(11)        | C(23)          | C(4)           |
| 13 | rs174560              | 61581764            | T                | C        | -                | C                | C                | G(8)         | G(8)         | C(22)          | C(4)           |
| 14 | rs174561              | 61582708            | T                | C        | -                | C                | C                | C(4)         | C(5)         | C(12)          |                |
| 15 | rs174562              | 61585144            | A                | G        | G                | G                | G                | G(9)         | G(9)         | G(20)          | A(1)           |
| 16 | rs174564              | 61588305            | A                | G        | G                | -                | G                | G(5)         | G(5)         | G(16)          | A(1)           |
| 17 | rs28456               | 61589481            | A                | G        | G                | -                | A                | A(2)         |              | G(24)          | A(2)           |
| 18 | rs174566              | 61592362            | A                | G        | A                | G                | G                | G(7)         | G(12)        |                | G(1)           |
| 19 | rs174567              | 61593005            | A                | G        | G                | G                | G                | G(5)         |              | G(15)          | G(1)           |
| 20 | rs174568              | 61593816            | C                | T        | T                | C                | C                | C(11)        | C(11)        | C(13),T(2)     |                |
| 21 | rs99780               | 61596633            | C                | T        | T                | T                | T                | T(7)         | T(17)        | T(16)          | T(3)           |
| 22 | rs1535                | 61597972            | A                | G        | G                | G                | G                | G(11)        | G(8)         | G(22)          | G(1)           |
| 23 | rs174574 <sup>b</sup> | 61600342            | C                | A        | A                | A                | A                | A(7)         | A(4)         | A(39)          | A(3)           |
| 24 | rs174576              | 61603510            | C                | A        | A                | A                | A                | A(17)        | A(6)         | A(28)          | A(3)           |
| 25 | rs174577              | 61604814            | C                | A        | A                | A                | A                | A(8)         | A(14)        | A(23)          | A(2)           |
| 26 | rs174578              | 61605499            | T                | A        | A                | A                | A                | A(7)         |              | A(15)          | A(3)           |
| 27 | rs174580              | 61606642            | A                | G        | G                | G                | G                | G(10)        | G(3)         | G(20)          | G(2)           |
| 28 | rs174581              | 61606683            | G                | A        | A                | A                | A                | A(6)         | A(8)         | G(17)          | A(2)           |

The numbers in parentheses show the read counts in support of a specific nucleotide.

Positions absent from the rhesus, gorilla or chimpanzee reference sequences are marked by hyphen signs (-). Empty cells indicates positions where there is no sequence read information, either due to insufficient coverage or because the nucleotide is missing.

<sup>a</sup> The nucleotides in these columns are from the rhesus (rheMac2), gorilla (gorGor3) and chimpanzee (panTro2) reference assemblies.

<sup>b</sup> The human reference sequence is identical to haplotype *D* with the only exception for rs174574 where the reference instead agrees with haplotype *A*.



**Table S3. Significant Rare SNPs Detected by Targeted Resequencing of the FADS Region in of Pools of Individuals with High/Low Levels of PC 36:4**

| <b>Chr:Offset (hg18)</b> | <b>Name (dbSNP132)</b> | <b>Locus</b> | <b>p Value, Two-Sided</b> |
|--------------------------|------------------------|--------------|---------------------------|
| chr11:61369044           | rs75321677             | <i>FADS2</i> | 3.01e-6                   |
| chr11:61367609           | rs75766519             | <i>FADS2</i> | 1.21e-5                   |
| chr11:61365899           | rs17156426             | <i>FADS2</i> | 2.96e-5                   |
| chr11:61363623           |                        | <i>FADS2</i> | 1.34e-4                   |
| chr11:61368286           | rs117983270            | <i>FADS2</i> | 1.02e-4                   |
| chr11:61369713           |                        | <i>FADS2</i> | 1.97e-4                   |
| chr11:61372118           | rs7935946              | <i>FADS2</i> | 2.03e-4                   |
| chr11:61378187           | rs73487492             | <i>FADS2</i> | 3.20e-4                   |
| chr11:61355905           | rs117553420            | <i>FADS2</i> | 6.94e-4                   |
| chr11:61370599           | rs17156442             | <i>FADS2</i> | 7.06e-4                   |
| chr11:61387858           | rs520298               | <i>FADS2</i> | 2.58e-4                   |
| chr11:61380369           | rs2526678              | <i>FADS2</i> | 4.04e-4                   |
| chr11:61371171           | rs2845572              | <i>FADS2</i> | 9.75e-4                   |
| chr11:61365580           | rs2727265              | <i>FADS2</i> | 7.89e-4                   |
| chr11:61335957           | rs116878346            | <i>FADS1</i> | 5.46e-3                   |
| chr11:61336464           |                        | <i>FADS1</i> | 1.73e-3                   |
| chr11:61388097           | rs7928482              | <i>FADS2</i> | 1.35e-2                   |
| chr11:61370417           | rs12284876             | <i>FADS2</i> | 3.04e-2                   |
| chr11:61369801           |                        | <i>FADS2</i> | 1.14e-2                   |
| chr11:61363683           | rs77020029             | <i>FADS2</i> | 2.59e-2                   |
| chr11:61360900           | rs117220229            | <i>FADS2</i> | 2.62e-2                   |
| chr11:61357778           | rs76498378             | <i>FADS2</i> | 1.86e-2                   |
| chr11:61366662           |                        | <i>FADS2</i> | 7.25e-3                   |
| chr11:61368489           | rs117702910            | <i>FADS2</i> | 5.05e-2                   |

The p values were calculated using the C-alpha test, which is designed specifically to investigate the effects of rare variants in high-throughput sequencing data.

**Table S4. Genotyping Results for 14 of the Predicted Rare Variants**

| SNP Id      | Call Rate | #Genotyped Ind. Carrying SNP | # <i>AA</i> Ind. | # <i>DD</i> Ind. | MAF <i>AA</i> Group | MAF <i>DD</i> Group |
|-------------|-----------|------------------------------|------------------|------------------|---------------------|---------------------|
| rs116878346 | .998      | 107                          | 35               | 1                | 0.11                | 0.001               |
| rs117553420 | .999      | 107                          | 35               | 1                | 0.11                | 0.001               |
| 11:61363623 | .998      | 191                          | 66               | 0                | 0.22                | 0                   |
| rs77020029  | .995      | 139                          | 45               | 1                | 0.14                | 0.001               |
| rs2727265   | .978      | 429                          | 123              | 0                | 0.50                | 0                   |
| rs17156426  | .999      | 139                          | 44               | 1                | 0.13                | 0.001               |
| rs75766519  | 1         | 137                          | 45               | 1                | 0.14                | 0.001               |
| rs117983270 | .999      | 82                           | 30               | 0                | 0.09                | 0                   |
| rs75321677  | 1         | 140                          | 45               | 1                | 0.14                | 0.001               |
| rs12284876  | .997      | 144                          | 45               | 2                | 0.14                | 0.002               |
| rs17156442  | .998      | 143                          | 45               | 2                | 0.14                | 0.002               |
| rs7935946   | .997      | 144                          | 45               | 2                | 0.14                | 0.002               |
| rs73487492  | .999      | 195                          | 65               | 3                | 0.20                | 0.004               |
| rs7928482   | .998      | 39                           | 14               | 0                | 0.04                | 0                   |

In total 180 of the 1308 individuals were homozygous for haplotype *A* (*AA*) and 492 for haplotype *D* (*DD*).
